# Supplementary material for: Construction and Evaluation of a High-Frequency Hearing Loss Screening Tool for Community Residents
Source: MDPI journal article supplement (doi:10.3390/ijerph182312311), 2021-11-23
Supplement: s1 [file s1]

**Table S1.** Summary of the non-modifiable, partly- and fully modifiable risk factors included in the questionnaire.

| Category          | Characteristic                       | Predictors                       | Time evolution         | Definitions                                        |
|-------------------|--------------------------------------|----------------------------------|------------------------|----------------------------------------------------|
| Non-modifiable    | Demographics and social determinants | Age                              | Current                | —                                                  |
|                   |                                      | Gender                           | Current                | —                                                  |
| Partly Modifiable |                                      | Marital status                   | Current                | —                                                  |
|                   |                                      | Education                        | Current                | Low-educated (junior high school and below)        |
|                   |                                      | Average monthly household income | Current                | Low-income ( $\leq 4000$ yuan)                     |
|                   |                                      | Familial disease                 | Current                | —                                                  |
|                   |                                      | Self-perceived hearing status    | Current                | Self-perceived hearing loss (petty loss and above) |
|                   | Symptom histories                    | Tinnitus history                 | Within the last year   | —                                                  |
|                   |                                      | Inner ear pain history           | Within the last year   | —                                                  |
|                   |                                      | Aural fullness history           | Within the last year   | —                                                  |
|                   | Disease conditions                   | Current hypertension             | Current or in the past | Anamnestic diagnosis                               |
|                   |                                      | Hyperlipidemia                   | Current or in the past | Anamnestic diagnosis                               |
|                   |                                      | Diabetes mellitus                | Current or in the past | Anamnestic diagnosis                               |
|                   |                                      | High cholesterol                 | Current or in the past | Anamnestic diagnosis                               |
|                   |                                      | Arteriosclerosis                 | Current or in the past | Anamnestic diagnosis                               |
|                   |                                      | Anemia                           | Current or in the past | Anamnestic diagnosis                               |
|                   |                                      | Migraine                         | Current or in the past | Anamnestic diagnosis                               |
|                   |                                      | Coronary heart disease           | Current or in the past | Anamnestic diagnosis                               |
|                   |                                      | Acute and chronic otitis media   | Current or in the past | Anamnestic diagnosis                               |
|                   |                                      | Tumors                           | Current or in the past | Anamnestic diagnosis                               |

|                     |                              |                                     |                        |                                                                                                                                                                                                                                                          |
|---------------------|------------------------------|-------------------------------------|------------------------|----------------------------------------------------------------------------------------------------------------------------------------------------------------------------------------------------------------------------------------------------------|
| Fully<br>Modifiable | Behavioral factors           | Smoking                             | Current or in the past | 1) none or little (smoking less than one cigarette a day on average for less than 1 year), 2) former (cessation of smoking since the past 6 months or more),3) current (smoking at least one cigarette a day for more than 1 year)                       |
|                     |                              | Secondhand smoking                  | Current or in the past | —                                                                                                                                                                                                                                                        |
|                     |                              | Alcohol consumption                 | Current or in the past | 1) none or little (less than once per week, each time the liquor does not exceed 150ml, and the beer does not exceed 500ml), 2) former (abstinence for more than 6 months), 3) current (at least once a week and lasts for at least half a year or more) |
|                     | Environmental exposure       | Bedtime                             | Within the last year   | —                                                                                                                                                                                                                                                        |
|                     |                              | Hours of sleep                      | Within the last year   | —                                                                                                                                                                                                                                                        |
|                     |                              | Earphone frequency                  | Within the last year   | —                                                                                                                                                                                                                                                        |
|                     |                              | Electronic device volume            | Within the last year   | —                                                                                                                                                                                                                                                        |
|                     |                              | Daily fruit and vegetable intaking  | Within the last year   | —                                                                                                                                                                                                                                                        |
|                     |                              | Exercise frequency                  | Within the last year   | —                                                                                                                                                                                                                                                        |
|                     |                              | Workplace noise exposure            | Within the last year   | Workplace noise exposure was defined as the participant's exposure to noise in the workplace at least once a week.                                                                                                                                       |
|                     |                              | Living noise exposure               | Within the last year   | Living noise exposure was defined as participants' exposure to noise living environment at least once a week (e.g., loud music or power tools).                                                                                                          |
|                     |                              | Work stress                         | Within the last year   | —                                                                                                                                                                                                                                                        |
|                     |                              | Life stress                         | Within the last year   | High life stress (relatively large and very large)                                                                                                                                                                                                       |
|                     | Hearing cognitive parameters | Pay attention to your hearing       | Within the last year   | —                                                                                                                                                                                                                                                        |
|                     |                              | Pay attention to hearing protection | Within the last year   | —                                                                                                                                                                                                                                                        |

|                           |                      |   |
|---------------------------|----------------------|---|
| Regular hearing check     | Within the last year | — |
| Hearing protection skills | Within the last year | — |

---

**Table S2.** Characteristics of high-frequency hearing loss cases and controls, obtained from the questionnaire.

| Characteristic                                 | Study cohort<br>(N=4010) | Control<br>n (%)<br>(N=1778) | Case<br>n (%)<br>(N=2232) | $\chi^2$ | <i>p</i> -value |
|------------------------------------------------|--------------------------|------------------------------|---------------------------|----------|-----------------|
| <b>Demographics and social determinants</b>    |                          |                              |                           |          |                 |
| <i>Age (years)</i>                             |                          |                              |                           | 1277.001 | < 0.001         |
| 18-25                                          | 195(4.9)                 | 176(9.9)                     | 19(0.9)                   |          |                 |
| 26-35                                          | 702(17.5)                | 570(32.1)                    | 132(5.9)                  |          |                 |
| 36-45                                          | 751(18.7)                | 476(26.8)                    | 275(12.3)                 |          |                 |
| 46-55                                          | 871(21.7)                | 363(20.4)                    | 508(22.8)                 |          |                 |
| 56-65                                          | 834(20.8)                | 145(8.2)                     | 689(30.9)                 |          |                 |
| 66-75                                          | 476(11.9)                | 39(2.2)                      | 437(19.6)                 |          |                 |
| ≥ 76                                           | 181(4.5)                 | 9(0.5)                       | 172(7.7)                  |          |                 |
| <i>Gender</i>                                  |                          |                              |                           | 23.95    | < 0.001         |
| Male                                           | 2086(52.0)               | 848(47.7)                    | 1238(55.5)                |          |                 |
| Female                                         | 1924(48.0)               | 930(52.3)                    | 994(44.5)                 |          |                 |
| <i>Marital status</i>                          |                          |                              |                           | 232.357  | < 0.001         |
| Unmarried                                      | 316(07.9)                | 264(14.8)                    | 52(2.3)                   |          |                 |
| Married                                        | 3580(89.3)               | 1484(83.5)                   | 2096(93.9)                |          |                 |
| Divorce                                        | 62(1.5)                  | 24(1.3)                      | 38(1.7)                   |          |                 |
| Widowed                                        | 52(1.3)                  | 6(0.3)                       | 46(2.1)                   |          |                 |
| <i>Education</i>                               |                          |                              |                           | 548.564  | < 0.001         |
| Primary schools and below                      | 552(13.8)                | 68(3.8)                      | 484(21.7)                 |          |                 |
| Junior high school                             | 826(20.6)                | 240(13.5)                    | 586(26.3)                 |          |                 |
| High school or technical secondary school      | 1000(24.9)               | 435(24.5)                    | 565(25.3)                 |          |                 |
| Junior college or undergraduate                | 1590(39.7)               | 1009(56.7)                   | 581(26.0)                 |          |                 |
| Postgraduate and above                         | 42(1.0)                  | 26(1.5)                      | 16(0.7)                   |          |                 |
| <i>Average monthly household income (yuan)</i> |                          |                              |                           | 225.934  | < 0.001         |
| ≤ 2000                                         | 600(15.0)                | 106(6.0)                     | 494(22.1)                 |          |                 |
| 2001-4000                                      | 995(24.8)                | 426(24.0)                    | 569(25.5)                 |          |                 |
| 4001-6000                                      | 1531(38.2)               | 782(44.0)                    | 749(33.6)                 |          |                 |
| 6001-8000                                      | 674(16.8)                | 352(19.8)                    | 322(14.4)                 |          |                 |
| > 8000                                         | 210(5.2)                 | 112(6.3)                     | 98(4.4)                   |          |                 |
| <i>Familial disease</i>                        |                          |                              |                           | 55.136   | < 0.001         |
| No                                             | 3726(92.9)               | 1712(96.3)                   | 2014(90.2)                |          |                 |
| Yes                                            | 284(7.1)                 | 66(3.7)                      | 218(9.8)                  |          |                 |
| <i>Self-perceived hearing status</i>           |                          |                              |                           | 567.807  | < 0.001         |
| Good                                           | 2722(67.9)               | 1550(87.2)                   | 1172(52.5)                |          |                 |
| Petty loss                                     | 946(23.6)                | 204(11.5)                    | 742(33.2)                 |          |                 |
| Moderate loss                                  | 274(6.8)                 | 22(1.2)                      | 252(11.3)                 |          |                 |
| Severe loss                                    | 56(1.4)                  | 1(0.1)                       | 55(2.5)                   |          |                 |
| Extreme loss                                   | 12(0.3)                  | 1(0.1)                       | 11(0.5)                   |          |                 |

| <b>Symptom histories</b>                           |            |             |            |  |         |         |
|----------------------------------------------------|------------|-------------|------------|--|---------|---------|
| <i>Tinnitus history within the past year</i>       |            |             |            |  | 127.979 | < 0.001 |
| No                                                 | 3125(77.9) | 1512(85.0)  | 1613(72.3) |  |         |         |
| Monthly                                            | 568(14.2)  | 212(11.9)   | 356(15.9)  |  |         |         |
| Weekly                                             | 183(4.6)   | 33(1.9)     | 150(6.7)   |  |         |         |
| Everyday                                           | 134(3.3)   | 21(1.2)     | 113(5.1)   |  |         |         |
| <i>Inner ear pain history within the past year</i> |            |             |            |  | 50.749  | < 0.001 |
| No                                                 | 3809(95.0) | 1735(97.6)  | 2074(92.9) |  |         |         |
| Monthly                                            | 146(3.6)   | 38(2.1)     | 108(4.8)   |  |         |         |
| Weekly                                             | 47(1.2)    | 3(0.2)      | 44(2.0)    |  |         |         |
| Everyday                                           | 8(0.2)     | 2(0.1)      | 6(0.3)     |  |         |         |
| <i>Aural fullness history within the past year</i> |            |             |            |  | 18.683  | < 0.001 |
| No                                                 | 3786(94.4) | 1708(96.1)  | 2078(93.1) |  |         |         |
| Monthly                                            | 185(4.6)   | 62(3.5)     | 123(5.5)   |  |         |         |
| Weekly                                             | 25(0.6)    | 5(0.3)      | 20(0.9)    |  |         |         |
| Everyday                                           | 14(0.3)    | 3(0.2)      | 11(0.5)    |  |         |         |
| <b>Disease conditions</b>                          |            |             |            |  |         |         |
| <i>Current hypertension</i>                        |            |             |            |  | 397.241 | < 0.001 |
| No                                                 | 3183(79.4) | 1665(93.6)  | 1518(68.0) |  |         |         |
| Yes                                                | 827(20.6)  | 113(6.4)    | 714(32.0)  |  |         |         |
| <i>Hyperlipidemia</i>                              |            |             |            |  | 55.806  | < 0.001 |
| No                                                 | 3778(94.2) | 1730(97.3)  | 2048(91.8) |  |         |         |
| Yes                                                | 232(5.8)   | 48(2.7)     | 184(8.2)   |  |         |         |
| <i>Diabetes mellitus</i>                           |            |             |            |  | 89.911  | < 0.001 |
| No                                                 | 3841(95.8) | 1763(99.2)  | 2078(93.1) |  |         |         |
| Yes                                                | 169(4.2)   | 15(0.8)     | 154(6.9)   |  |         |         |
| <i>High cholesterol</i>                            |            |             |            |  | 8.689   | 0.003   |
| No                                                 | 3907(97.4) | 1747(98.3)  | 2160(96.8) |  |         |         |
| Yes                                                | 103(2.6)   | 31(1.7)     | 72(3.2)    |  |         |         |
| <i>Arteriosclerosis</i>                            |            |             |            |  | 11.811  | 0.001   |
| No                                                 | 3991(99.5) | 1777(99.9)  | 2214(99.2) |  |         |         |
| Yes                                                | 19(0.5)    | 1(0.1)      | 18(0.8)    |  |         |         |
| <i>Anemia</i>                                      |            |             |            |  | 0.002   | 0.964   |
| No                                                 | 3864(96.4) | 1713(96.3)  | 2151(96.4) |  |         |         |
| Yes                                                | 146(3.6)   | 65(3.7)     | 81(3.6)    |  |         |         |
| <i>Migraine</i>                                    |            |             |            |  | 3.929   | 0.047   |
| No                                                 | 3879(96.7) | 1731(97.4)  | 2148(96.2) |  |         |         |
| Yes                                                | 131(3.3)   | 47(2.6)     | 84(3.8)    |  |         |         |
| <i>Coronary heart disease</i>                      |            |             |            |  | 18.427  | < 0.001 |
| No                                                 | 3987(99.4) | 1778(100.0) | 2209(99.0) |  |         |         |
| Yes                                                | 23(0.6)    | 0(0.0)      | 23(1.0)    |  |         |         |
| <i>Acute and chronic otitis media</i>              |            |             |            |  | 33.339  | < 0.001 |
| No                                                 | 3920(97.8) | 1765(99.3)  | 2155(96.6) |  |         |         |
| Yes                                                | 90(2.2)    | 13(0.7)     | 77(3.4)    |  |         |         |

|                                           |                     |            |            |            |         |         |
|-------------------------------------------|---------------------|------------|------------|------------|---------|---------|
| <i>Tumors</i>                             |                     |            |            |            | 0.739   | 0.39    |
|                                           | No                  | 3995(99.6) | 1773(99.7) | 2222(99.6) |         |         |
|                                           | Yes                 | 15(0.4)    | 5(0.3)     | 10(0.4)    |         |         |
| <b>Behavioral factors</b>                 |                     |            |            |            |         |         |
| <i>Smoking</i>                            |                     |            |            |            | 156.89  | < 0.001 |
|                                           | None or very little | 2954(73.7) | 1471(82.7) | 1483(66.4) |         |         |
|                                           | Former              | 226(5.6)   | 35(2.0)    | 191(8.6)   |         |         |
|                                           | Current             | 830(20.7)  | 272(15.3)  | 558(25.0)  |         |         |
| <i>Secondhand smoking</i>                 |                     |            |            |            | 49.25   | < 0.001 |
|                                           | No                  | 2166(54.0) | 963(54.2)  | 1203(53.9) |         |         |
|                                           | 1-2 days a week     | 862(21.5)  | 446(25.1)  | 416(18.6)  |         |         |
|                                           | 3-5 days a week     | 453(11.3)  | 197(11.1)  | 256(11.5)  |         |         |
|                                           | ≥ 5 days a week     | 529(13.2)  | 172(9.7)   | 357(16.0)  |         |         |
| <i>Alcohol consumption</i>                |                     |            |            |            | 88.07   | < 0.001 |
|                                           | None or very little | 3282(81.8) | 1569(88.2) | 1713(76.7) |         |         |
|                                           | Former              | 68(1.7)    | 19(1.1)    | 49(2.2)    |         |         |
|                                           | Current             | 660(16.5)  | 190(10.7)  | 470(21.1)  |         |         |
| <i>Bedtime</i>                            |                     |            |            |            | 126.758 | < 0.001 |
|                                           | < 21                | 308(7.7)   | 101(5.7)   | 207(9.3)   |         |         |
|                                           | 21-23               | 2726(68.0) | 1096(61.6) | 1630(73.0) |         |         |
|                                           | ≥ 23                | 976(24.3)  | 581(32.7)  | 395(17.7)  |         |         |
| <i>Hours of sleep</i>                     |                     |            |            |            | 32.34   | < 0.001 |
|                                           | < 4 hours           | 27(0.7)    | 6(0.3)     | 21(0.9)    |         |         |
|                                           | 4-6 hours           | 237(5.9)   | 77(4.3)    | 160(7.2)   |         |         |
|                                           | 6-8 hours           | 2583(64.4) | 1218(68.5) | 1365(61.2) |         |         |
|                                           | ≥ 8 hours           | 1163(29.0) | 477(26.8)  | 686(30.7)  |         |         |
| <i>Earphone frequency</i>                 |                     |            |            |            | 253.343 | < 0.001 |
|                                           | Never               | 2727(68.0) | 980(55.1)  | 1747(78.3) |         |         |
|                                           | Once a week         | 785(19.6)  | 462(26.0)  | 323(14.5)  |         |         |
|                                           | 1-2 times a day     | 423(10.5)  | 283(15.9)  | 140(6.3)   |         |         |
|                                           | ≥ 3 times a day     | 75(1.9)    | 53(3.0)    | 22(1.0)    |         |         |
| <i>Electronic device volume</i>           |                     |            |            |            | 176.896 | < 0.001 |
|                                           | < 40 %              | 1224(30.5) | 664(37.3)  | 560(25.1)  |         |         |
|                                           | 40-80 %             | 2018(50.3) | 928(52.2)  | 1090(48.8) |         |         |
|                                           | ≥ 80 %              | 768(19.2)  | 186(10.5)  | 582(26.1)  |         |         |
| <i>Daily fruit and vegetable intaking</i> |                     |            |            |            | 46.263  | < 0.001 |
|                                           | < 500g              | 1617(40.3) | 612(34.4)  | 1005(45.0) |         |         |
|                                           | ≥ 500g              | 2393(59.7) | 1166(65.6) | 1227(55.0) |         |         |
| <i>Exercise frequency</i>                 |                     |            |            |            | 111.523 | < 0.001 |
|                                           | Barely              | 1600(39.9) | 581(32.7)  | 1019(45.7) |         |         |
|                                           | 1-3 times a month   | 780(19.5)  | 407(22.9)  | 373(16.7)  |         |         |
|                                           | 1-2 times a week    | 650(16.2)  | 342(19.2)  | 308(13.8)  |         |         |
|                                           | 3-4 times a week    | 369(9.2)   | 211(11.9)  | 158(7.1)   |         |         |
|                                           | > 4 times a week    | 611(15.2)  | 237(13.3)  | 374(16.8)  |         |         |

|                                              |            |            |            |  |         |         |
|----------------------------------------------|------------|------------|------------|--|---------|---------|
| <b>Environmental Exposure</b>                |            |            |            |  |         |         |
| <i>Workplace noise exposure (categories)</i> |            |            |            |  | 17.147  | < 0.001 |
| None or very little                          | 2603(64.9) | 1193(67.1) | 1410(63.2) |  |         |         |
| At least once a week                         | 947(23.6)  | 422(23.7)  | 525(23.5)  |  |         |         |
| At least once a day                          | 460(11.5)  | 163(9.2)   | 297(13.3)  |  |         |         |
| <i>Workplace noise exposure (binary)</i>     |            |            |            |  | 6.697   | 0.01    |
| No                                           | 2603(64.9) | 1193(67.1) | 1410(63.2) |  |         |         |
| Yes                                          | 1407(35.1) | 585(32.9)  | 822(36.8)  |  |         |         |
| <i>Living noise exposure</i>                 |            |            |            |  | 12.073  | 0.002   |
| None or very little                          | 3088(77.0) | 1412(79.4) | 1676(75.1) |  |         |         |
| At least once a week                         | 612(15.3)  | 252(14.2)  | 360(16.1)  |  |         |         |
| At least once a day                          | 310(7.7)   | 114(6.4)   | 196(8.8)   |  |         |         |
| <i>Work stress</i>                           |            |            |            |  | 167.473 | < 0.001 |
| Very large                                   | 111(2.8)   | 61(3.4)    | 50(2.2)    |  |         |         |
| Relatively large                             | 956(23.8)  | 400(22.5)  | 556(24.9)  |  |         |         |
| Common                                       | 1562(39.0) | 808(45.4)  | 754(33.8)  |  |         |         |
| Relatively small                             | 906(22.6)  | 419(23.6)  | 487(21.8)  |  |         |         |
| Very small                                   | 475(11.8)  | 90(5.1)    | 385(17.2)  |  |         |         |
| <i>Life stress</i>                           |            |            |            |  | 136.028 | < 0.001 |
| Very large                                   | 106(2.6)   | 49(2.8)    | 57(2.6)    |  |         |         |
| Relatively large                             | 650(16.2)  | 245(13.8)  | 405(18.1)  |  |         |         |
| Common                                       | 1717(42.8) | 886(49.8)  | 831(37.2)  |  |         |         |
| Relatively small                             | 1036(25.8) | 479(26.9)  | 557(25.0)  |  |         |         |
| Very small                                   | 501(12.5)  | 119(6.7)   | 382(17.1)  |  |         |         |
| <b>Hearing cognitive parameters</b>          |            |            |            |  |         |         |
| <i>Pay attention to your hearing</i>         |            |            |            |  | 68.743  | < 0.001 |
| Don't care                                   | 732(18.3)  | 374(21.0)  | 358(16.0)  |  |         |         |
| Not much attention                           | 1151(28.7) | 496(27.9)  | 655(29.3)  |  |         |         |
| Common                                       | 1220(30.4) | 565(31.8)  | 655(29.3)  |  |         |         |
| Attention                                    | 733(18.3)  | 313(17.6)  | 420(18.8)  |  |         |         |
| Very concerned                               | 174(4.3)   | 30(1.7)    | 144(6.5)   |  |         |         |
| <i>Pay attention to hearing protection</i>   |            |            |            |  | 54.537  | < 0.001 |
| Don't care                                   | 824(20.5)  | 391(22.0)  | 433(19.4)  |  |         |         |
| Not much attention                           | 1045(26.1) | 458(25.8)  | 587(26.3)  |  |         |         |
| Common                                       | 1330(33.2) | 629(35.4)  | 701(31.4)  |  |         |         |
| Attention                                    | 651(16.2)  | 271(15.2)  | 380(17.0)  |  |         |         |
| Very concerned                               | 160(4.0)   | 29(1.6)    | 131(5.9)   |  |         |         |
| <i>Regular hearing check</i>                 |            |            |            |  | 18.825  | < 0.001 |
| No need                                      | 570(14.2)  | 263(14.8)  | 307(13.8)  |  |         |         |
| Uncertain                                    | 1499(37.4) | 613(34.5)  | 886(39.7)  |  |         |         |
| Needed                                       | 1680(41.9) | 798(44.9)  | 882(39.5)  |  |         |         |
| Necessary                                    | 207(5.2)   | 87(4.9)    | 120(5.4)   |  |         |         |
| Very necessary                               | 54(1.3)    | 17(1.0)    | 37(1.7)    |  |         |         |
| <i>Hearing protection skills</i>             |            |            |            |  | 55.838  | < 0.001 |

|                                |            |           |            |
|--------------------------------|------------|-----------|------------|
| don't know or know very little | 2219(55.3) | 976(54.9) | 1243(55.7) |
| Understand                     | 1192(29.7) | 558(31.4) | 634(28.4)  |
| Know                           | 238(5.9)   | 125(7.0)  | 113(5.1)   |
| Familiar                       | 186(4.6)   | 86(4.8)   | 100(4.5)   |
| Very Familiar                  | 175(4.4)   | 33(1.9)   | 142(6.4)   |

---



**Table S3.** The estimated coefficients in the Lasso regression.

| Variable                                    | $\beta$ |
|---------------------------------------------|---------|
| Intercept                                   | -2.912  |
| Demographics and social determinants        |         |
| Age (years)                                 | 0.700   |
| Gender                                      | -0.199  |
| Education                                   | -0.266  |
| Average monthly household income (yuan)     | -0.033  |
| Self-perceived hearing status               | 0.850   |
| Symptom histories                           |         |
| Tinnitus history within the past year       | 0.053   |
| Aural fullness history within the past year | -0.070  |
| Disease histories                           |         |
| Current hypertension                        | 0.583   |
| Diabetes mellitus                           | 0.276   |
| Coronary heart disease                      | 0.850   |
| Acute and chronic otitis media              | 0.593   |
| Behavioral factors                          |         |
| Smoking                                     | 0.056   |
| Secondhand smoking                          | 0.034   |
| Alcohol consumption                         | 0.031   |
| Bedtime                                     | -0.021  |
| Earphone frequency                          | 0.008   |
| Electronic device volume                    | 0.092   |
| Exercise frequency                          | -0.018  |
| Environmental exposure                      |         |
| Workplace noise exposure                    | 0.070   |
| Life stress                                 | -0.066  |
| Hearing cognitive parameters                |         |
| Pay attention to your hearing               | 0.066   |
| Hearing protection skills                   | 0.056   |

**Table S4.** Distribution of impactful risk predictors across the three risk categories.

| Risk category                                      |                                           | Low      | Medium      | High        |
|----------------------------------------------------|-------------------------------------------|----------|-------------|-------------|
| Risk score intervals                               |                                           | [0,0.50] | [0.50,0.80] | [0.80,1.00] |
| <b>High-frequency hearing loss</b>                 |                                           | 457      | 681         | 1094        |
| <b>Demographics and social determinants</b>        |                                           |          |             |             |
| <i>Age (years)</i>                                 |                                           |          |             |             |
|                                                    | 18-25                                     | 3.9%     | 0.1%        | 0.0%        |
|                                                    | 26-35                                     | 26.5%    | 1.5%        | 0.1%        |
|                                                    | 36-45                                     | 44.4%    | 9.3%        | 0.8%        |
|                                                    | 46-55                                     | 24.5%    | 40.7%       | 10.9%       |
|                                                    | 56-65                                     | 0.7%     | 44.9%       | 34.7%       |
|                                                    | 66-75                                     | 0.0%     | 3.5%        | 37.8%       |
|                                                    | ≥ 76                                      | 0.0%     | 0.0%        | 15.7%       |
| <i>Gender</i>                                      |                                           |          |             |             |
|                                                    | Male                                      | 51.6%    | 50.4%       | 60.2%       |
|                                                    | Female                                    | 48.4%    | 49.6%       | 39.8%       |
| <i>Education</i>                                   |                                           |          |             |             |
|                                                    | Primary schools and below                 | 0.9%     | 14.5%       | 34.8%       |
|                                                    | Junior high school                        | 10.5%    | 30.1%       | 30.4%       |
|                                                    | High school or technical secondary school | 23.6%    | 31.0%       | 22.5%       |
|                                                    | Junior college or Undergraduate           | 62.1%    | 24.1%       | 12.2%       |
|                                                    | Postgraduate and above                    | 2.8%     | 0.3%        | 0.1%        |
| <i>Average monthly household income (yuan)</i>     |                                           |          |             |             |
|                                                    | ≤ 2000                                    | 4.4%     | 19.5%       | 31.2%       |
|                                                    | 2001-4000                                 | 16.6%    | 25.7%       | 29.1%       |
|                                                    | 4001-6000                                 | 50.3%    | 34.1%       | 26.2%       |
|                                                    | 6001-8000                                 | 22.1%    | 15.1%       | 10.8%       |
|                                                    | > 8000                                    | 6.6%     | 5.6%        | 2.7%        |
| <i>Self-perceived hearing status</i>               |                                           |          |             |             |
|                                                    | Good                                      | 90.4%    | 72.8%       | 24.0%       |
|                                                    | Petty loss                                | 9.6%     | 25.3%       | 48.1%       |
|                                                    | Moderate loss                             | 0.0%     | 1.8%        | 21.9%       |
|                                                    | Severe loss                               | 0.0%     | 0.1%        | 4.9%        |
|                                                    | Extreme loss                              | 0.0%     | 0.0%        | 1.0%        |
| <b>Symptom histories</b>                           |                                           |          |             |             |
| <i>Tinnitus history within the past year</i>       |                                           |          |             |             |
|                                                    | No                                        | 90.2%    | 76.4%       | 62.2%       |
|                                                    | Monthly                                   | 7.0%     | 15.1%       | 20.2%       |
|                                                    | Weekly                                    | 1.8%     | 5.0%        | 9.9%        |
|                                                    | Everyday                                  | 1.1%     | 3.5%        | 7.7%        |
| <i>Aural fullness history within the past year</i> |                                           |          |             |             |
|                                                    | No                                        | 96.9%    | 94.0%       | 91.0%       |
|                                                    | Monthly                                   | 2.6%     | 5.1%        | 6.9%        |
|                                                    | Weekly                                    | 0.4%     | 0.6%        | 1.3%        |

|                                       |        |       |       |
|---------------------------------------|--------|-------|-------|
| Everyday                              | 0.0%   | 0.3%  | 0.8%  |
| <b>Disease conditions</b>             |        |       |       |
| <i>Current hypertension</i>           |        |       |       |
| No                                    | 95.8%  | 83.6% | 46.7% |
| Yes                                   | 4.2%   | 16.4% | 53.3% |
| <i>Diabetes mellitus</i>              |        |       |       |
| No                                    | 99.3%  | 97.1% | 88.0% |
| Yes                                   | 0.7%   | 2.9%  | 12.0% |
| <i>Coronary heart disease</i>         |        |       |       |
| No                                    | 100.0% | 99.6% | 98.2% |
| Yes                                   | 0.0%   | 0.4%  | 1.8%  |
| <i>Acute and chronic otitis media</i> |        |       |       |
| No                                    | 98.5%  | 97.4% | 95.2% |
| Yes                                   | 1.5%   | 2.6%  | 4.8%  |
| <b>Behavioral factors</b>             |        |       |       |
| <i>Smoking</i>                        |        |       |       |
| None or very little                   | 79.0%  | 70.0% | 59.0% |
| Former                                | 2.6%   | 4.8%  | 13.3% |
| Current                               | 18.4%  | 25.1% | 27.7% |
| <i>Secondhand smoking</i>             |        |       |       |
| No                                    | 54.9%  | 52.3% | 54.5% |
| 1-2 days a week                       | 23.9%  | 19.7% | 15.8% |
| 3-5 days a week                       | 10.3%  | 12.8% | 11.2% |
| ≥ 5 days a week                       | 10.9%  | 15.3% | 18.6% |
| <i>Alcohol consumption</i>            |        |       |       |
| None or very little                   | 86.7%  | 79.7% | 70.7% |
| Former                                | 1.1%   | 1.3%  | 3.2%  |
| Current                               | 12.3%  | 18.9% | 26.1% |
| <i>Bedtime</i>                        |        |       |       |
| < 21                                  | 3.3%   | 7.3%  | 13.0% |
| 21-23                                 | 70.7%  | 71.5% | 75.0% |
| ≥ 23                                  | 26.0%  | 21.1% | 12.1% |
| <i>Headphone frequency</i>            |        |       |       |
| Never                                 | 50.3%  | 80.3% | 88.7% |
| Once a week                           | 34.1%  | 13.4% | 6.9%  |
| 1-2 times a day                       | 13.3%  | 5.4%  | 3.8%  |
| ≥ 3 times a day                       | 2.2%   | 0.9%  | 0.5%  |
| <i>Electronic device volume</i>       |        |       |       |
| < 40%                                 | 30.0%  | 31.4% | 19.1% |
| 40%-80%                               | 62.8%  | 48.6% | 43.1% |
| ≥ 80%                                 | 7.2%   | 20.0% | 37.8% |
| <i>Exercise frequency</i>             |        |       |       |
| Barely                                | 31.7%  | 41.7% | 53.9% |
| 1-3 times a month                     | 26.3%  | 18.1% | 11.9% |

|                                      |       |       |       |
|--------------------------------------|-------|-------|-------|
| 1-2 times a week                     | 22.3% | 15.3% | 9.3%  |
| 3-4 times a week                     | 9.6%  | 6.9%  | 6.1%  |
| > 4 times a week                     | 10.1% | 18.1% | 18.7% |
| <b>Environmental exposure</b>        |       |       |       |
| <i>Workplace noise exposure</i>      |       |       |       |
| No                                   | 57.1% | 69.2% | 62.0% |
| Yes                                  | 42.9% | 30.8% | 38.0% |
| <i>Life stress</i>                   |       |       |       |
| Very large                           | 2.2%  | 3.2%  | 2.3%  |
| Relatively large                     | 21.4% | 16.0% | 18.1% |
| Common                               | 51.0% | 34.4% | 33.3% |
| Relatively small                     | 20.6% | 28.2% | 24.8% |
| Very small                           | 4.8%  | 18.2% | 21.6% |
| <b>Hearing cognitive parameters</b>  |       |       |       |
| <i>Pay attention to your hearing</i> |       |       |       |
| Don't care                           | 17.9% | 14.1% | 16.5% |
| Not much attention                   | 27.8% | 28.0% | 30.8% |
| Common                               | 37.2% | 31.3% | 24.9% |
| Attention                            | 15.5% | 20.4% | 19.2% |
| Very concerned                       | 1.5%  | 6.2%  | 8.7%  |
| <i>Hearing protection skills</i>     |       |       |       |
| Don't know or know very little       | 53.6% | 50.8% | 59.6% |
| Understand                           | 36.1% | 32.3% | 22.8% |
| Know                                 | 6.8%  | 5.1%  | 4.3%  |
| Familiar                             | 2.4%  | 5.1%  | 4.9%  |
| Very Familiar                        | 1.1%  | 6.6%  | 8.4%  |
